# Supplementary material
Source: publisher site journal article supplement (https://www.dovepress.com/article/558228)
Supplement: Supplementary file 1 [file 558228-Supplementary-PSSS_1.docx]

**Supplementary table 1 - Psychosomatic Symptom Scale (PSSS)**

|  | Over the **last 4 weeks**, how often have you suffered from each of following symptoms?  *Circle the number that indicates your answer.* | Never | Rare or several days | More than half the days | Most of the time or every day |
| --- | --- | --- | --- | --- | --- |
| 1 | Feeling of dizziness or fullness in the head | 0 | 1 | 2 | 3 |
| 2 | Eyes are dry or puffy, or vision is blurred | 0 | 1 | 2 | 3 |
| 3 | Having a burning sensation or feeling of tightness | 0 | 1 | 2 | 3 |
| 4 | Limb is shaking or numb | 0 | 1 | 2 | 3 |
| 5 | Feeling depressed, down or hopeless | 0 | 1 | 2 | 3 |
| 6 | Feeling discomfort in the precordial area, palpitation or a racing heart | 0 | 1 | 2 | 3 |
| 7 | Feeling chest tightness, wheeziness or difficulty breathing | 0 | 1 | 2 | 3 |
| 8 | Feeling discomfort in the throat | 0 | 1 | 2 | 3 |
| 9 | Buzzing in the ears or brain | 0 | 1 | 2 | 3 |
| 10 | No interest, pleasure, initiative or meaningfulness in doing things | 0 | 1 | 2 | 3 |
| 11 | Feeling more angry or irritated than usual | 0 | 1 | 2 | 3 |
| 12 | Feeling nervous, worried, frightened or panicked |  |  |  |  |
| 13 | Dryness in the mouth or a thick and greasy tongue | 0 | 1 | 2 | 3 |
| 14 | Belching, sour regurgitation or heartburn | 0 | 1 | 2 | 3 |
| 15 | Burping, nausea or vomiting | 0 | 1 | 2 | 3 |
| 16 | Borborygmus, abdominal distension, diarrhea or constipation | 0 | 1 | 2 | 3 |
| 17 | Avoidance of situations that make you nervous | 0 | 1 | 2 | 3 |
| 18 | Frequent or urgent urine discharge, nocturia or difficulty urinating | 0 | 1 | 2 | 3 |
| 19 | Perineal discomfort | 0 | 1 | 2 | 3 |
| 20 | Spermatorrhea or premature ejaculation (only in **males**) **OR** abnormal menstruation or menalgia (only in **females**) | 0 | 1 | 2 | 3 |
| 21 | Thoughts of hurting yourself | 0 | 1 | 2 | 3 |
| 22 | Feeling feverish or cold | 0 | 1 | 2 | 3 |
| 23 | Pain, e.g., general, local or wandering pain | 0 | 1 | 2 | 3 |
| 24 | Feeling of general tiredness | 0 | 1 | 2 | 3 |
| 25 | Having repeated thoughts or actions | 0 | 1 | 2 | 3 |
| 26 | Having difficulty falling asleep, being easily wakened, or waking too early | 0 | 1 | 2 | 3 |
| **Total Score:** | | | | |  |
